# Supplementary material for: Long-term air pollution, cardiometabolic multimorbidity, and genetic susceptibility: a multi-state modeling study of 415,855 participants
Source: bioRxiv or medRxiv preprint supplement (doi:10.1101/2022.09.15.22280006), 2022-09-19

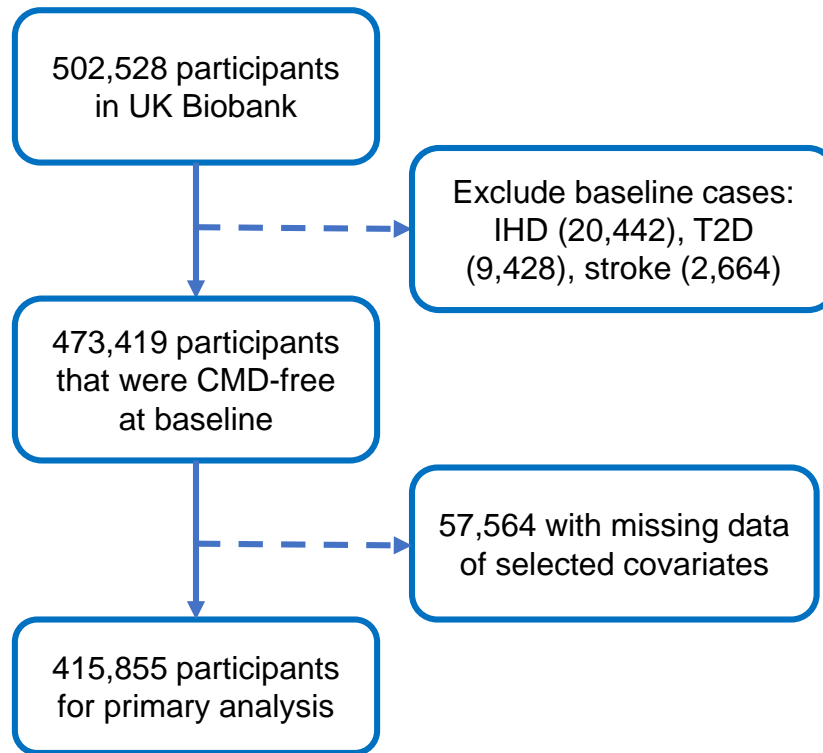

Supplement: Supplementary file [file media-4.pdf]
