# Supplementary material for: Long-term air pollution, cardiometabolic multimorbidity, and genetic susceptibility: a multi-state modeling study of 415,855 participants
Source: bioRxiv or medRxiv preprint supplement (doi:10.1101/2022.09.15.22280006), 2022-09-19
Supplement: Supplementary file [file media-4.pdf]

Baseline→FCMD

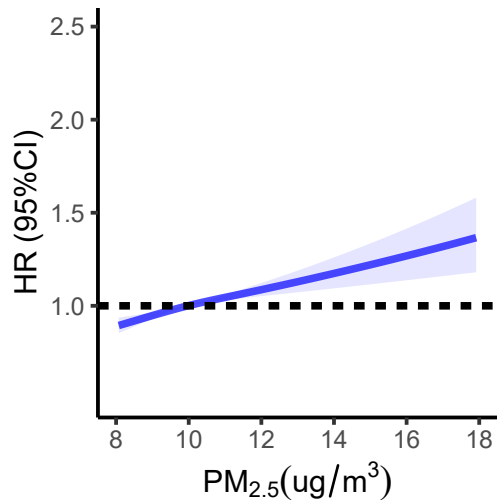

Baseline→Death

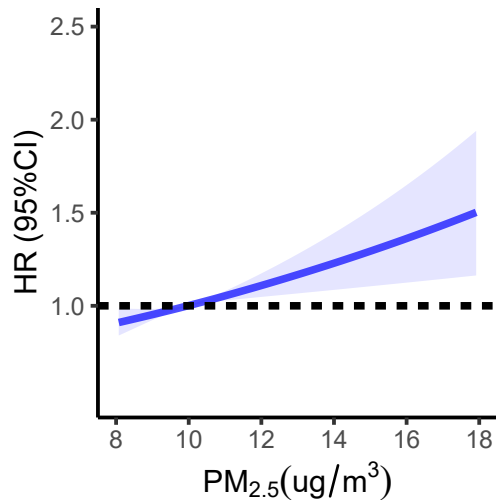

FCMD→CMM

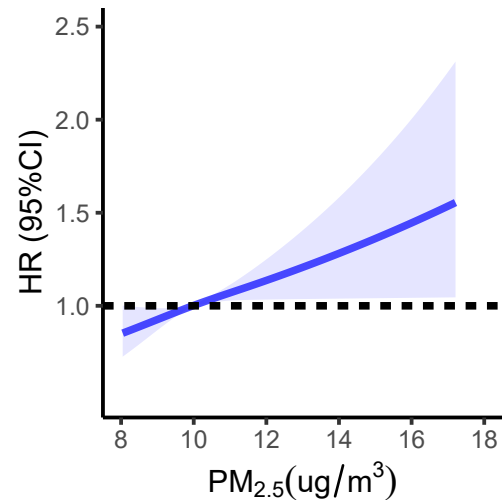

FCMD→Death

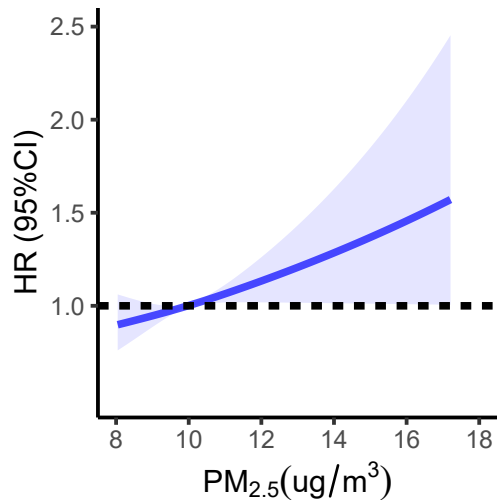

CMM→Death

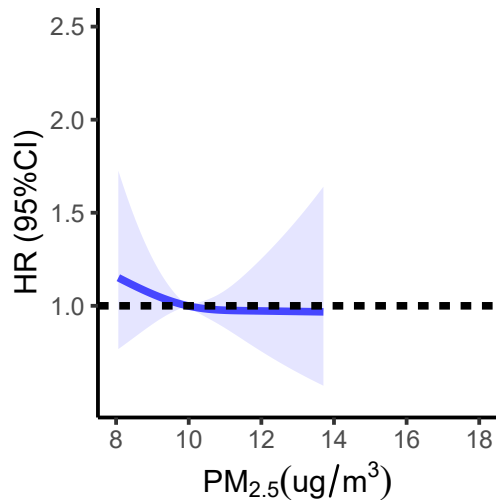

**a. PM<sub>2.5</sub>**

Baseline→FCMD

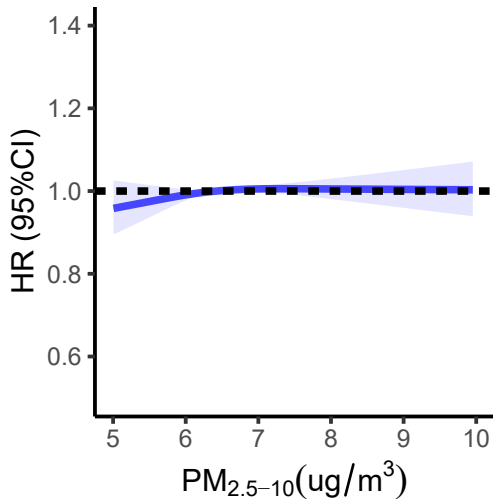

Baseline→Death

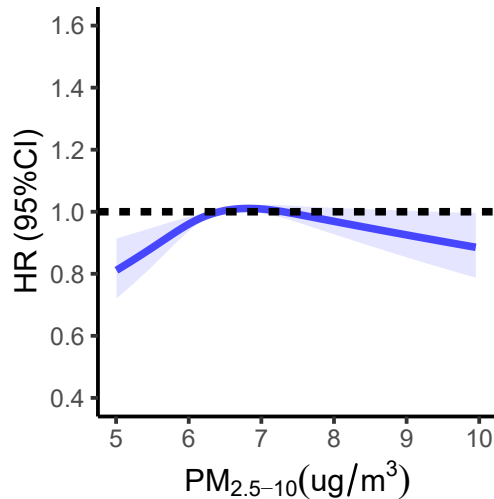

FCMD→CMM

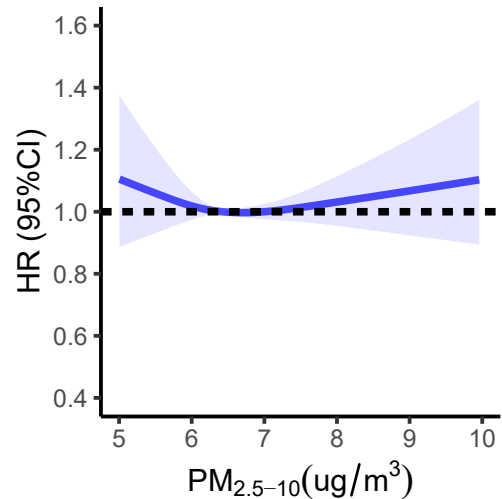

FCMD→Death

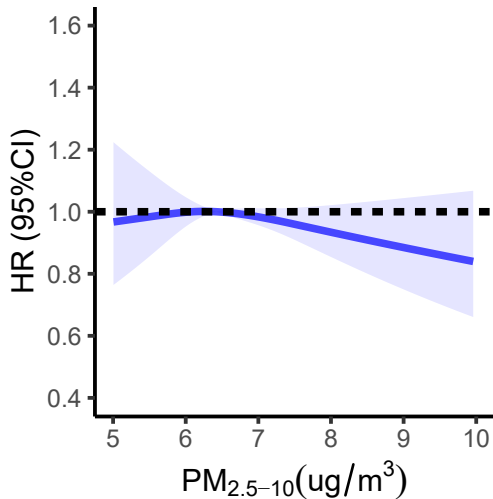

CMM→Death

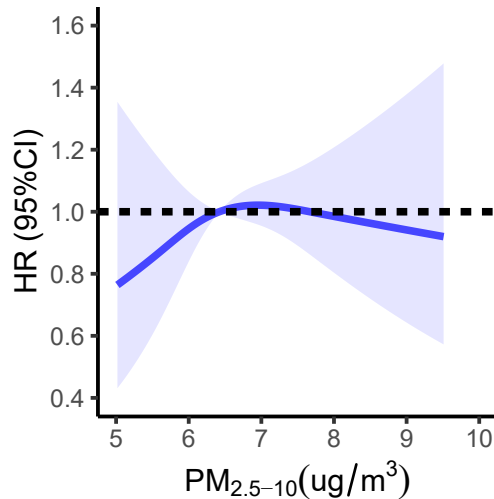**b. PM<sub>2.5-10</sub>**

Baseline→FCMD

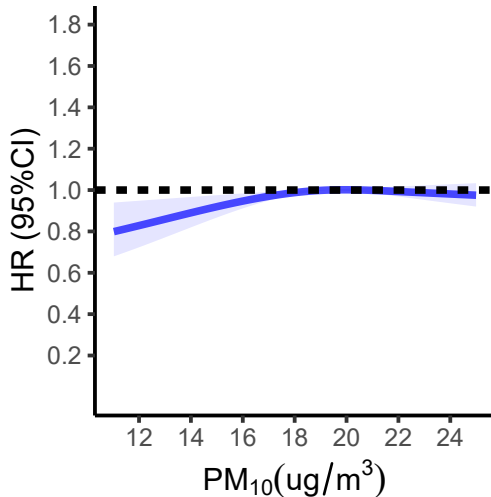

Baseline→Death

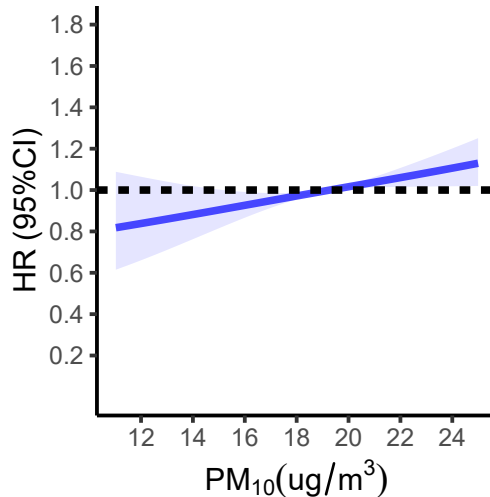

FCMD→CMM

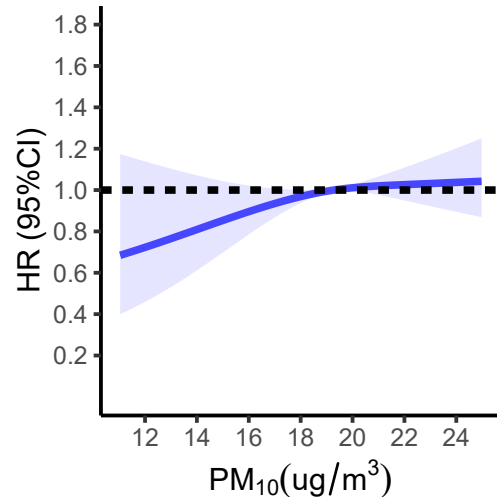

FCMD→Death

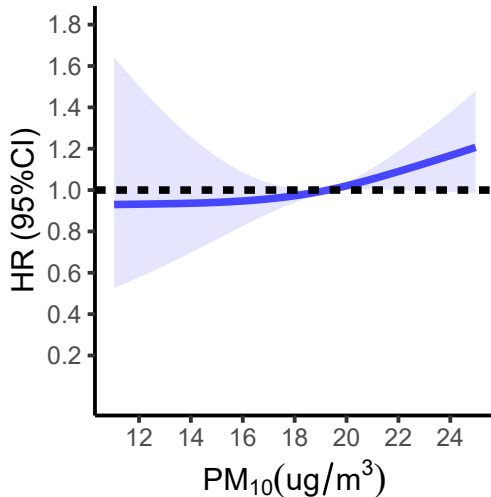

CMM→Death

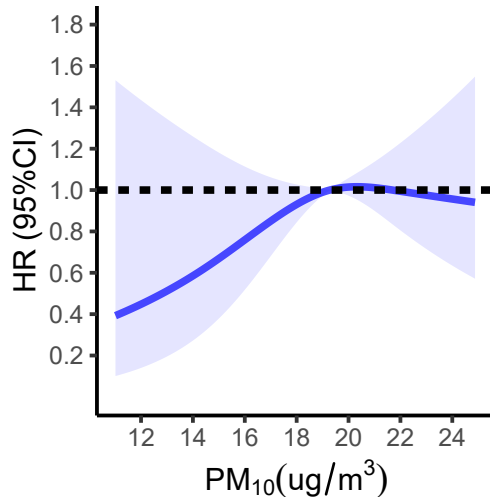

**c. PM<sub>10</sub>**

Baseline→FCMD

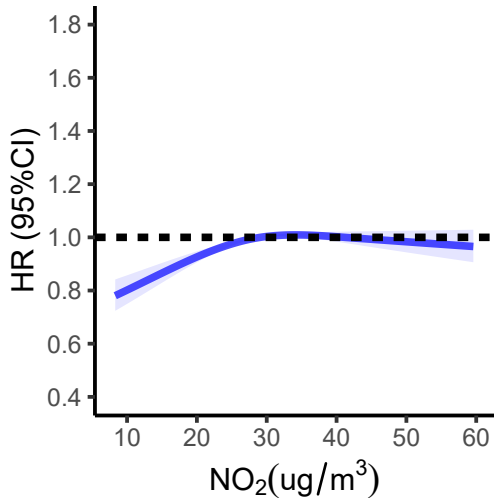

Baseline→Death

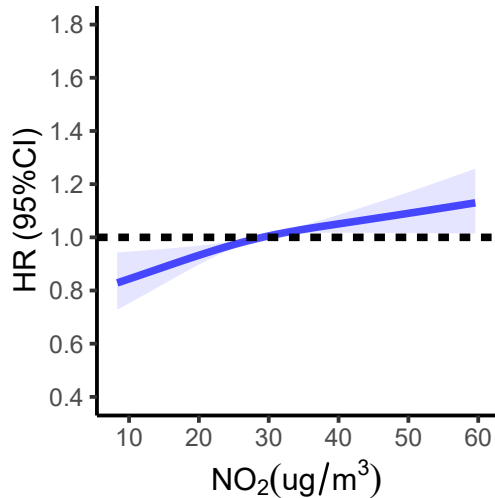

FCMD→CMM

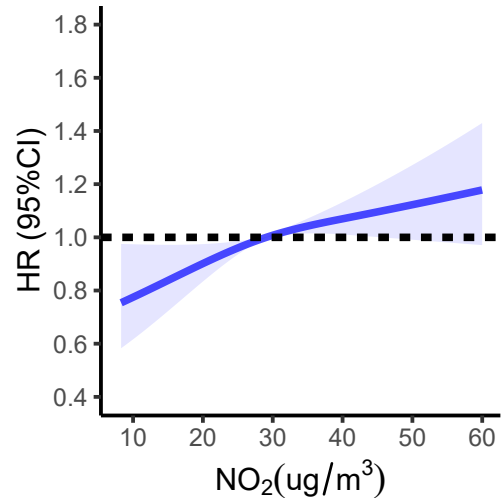

FCMD→Death

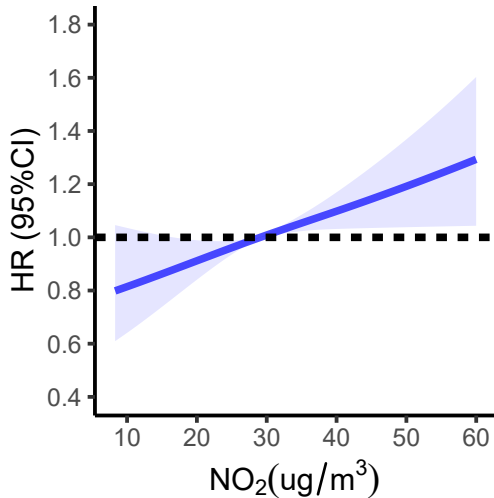

CMM→Death

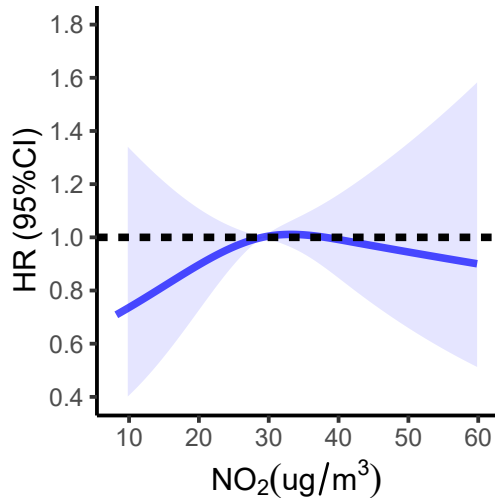**d. NO<sub>2</sub>**

Baseline→FCMD

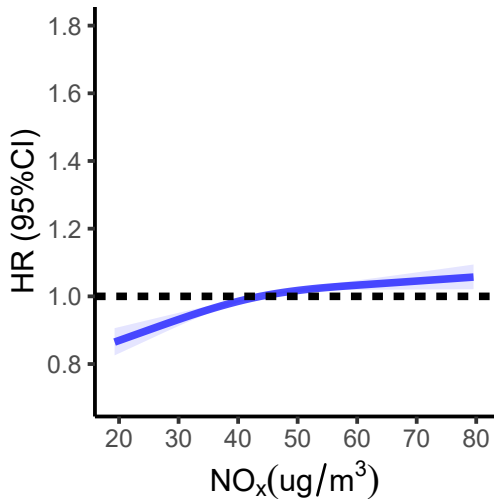

Baseline→Death

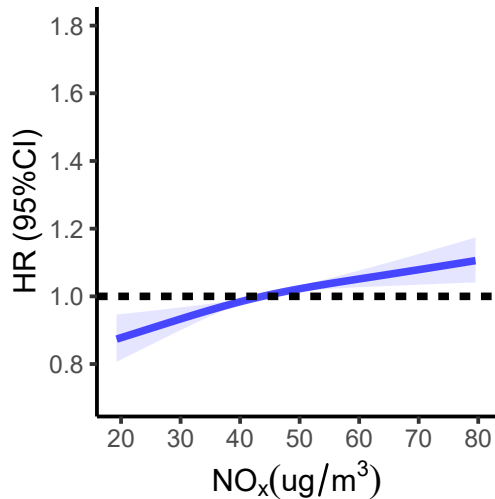

FCMD→CMM

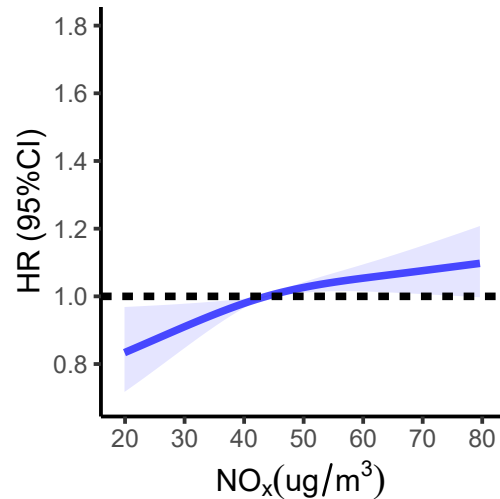

FCMD→Death

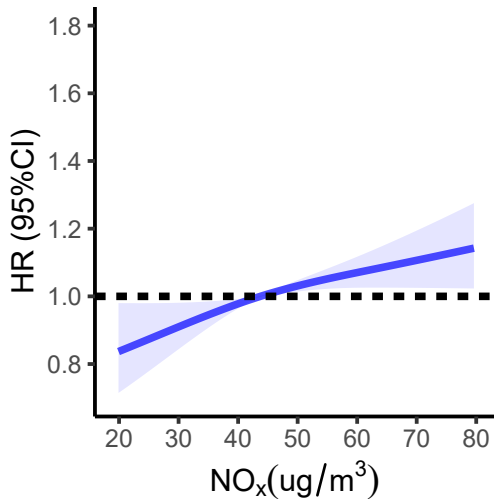

CMM→Death

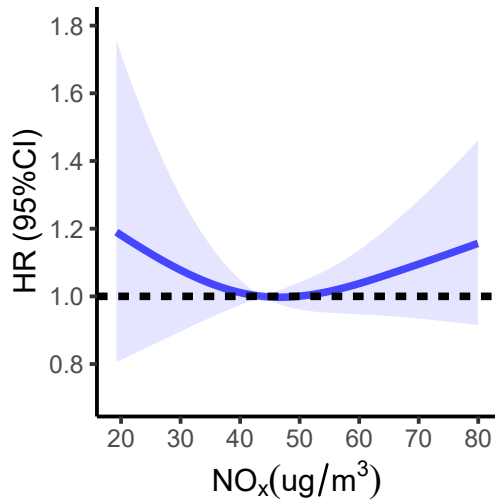**e. NO<sub>x</sub>**

Baseline→FCMD

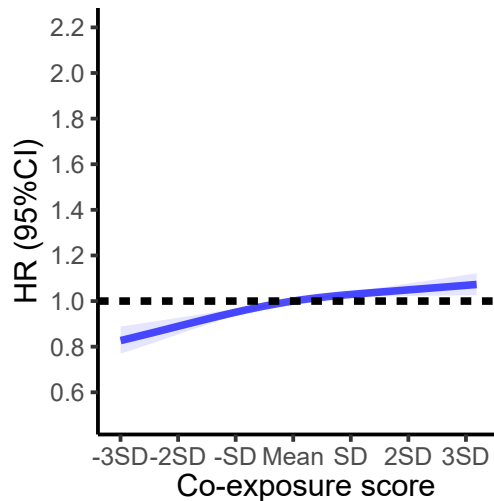

Baseline→Death

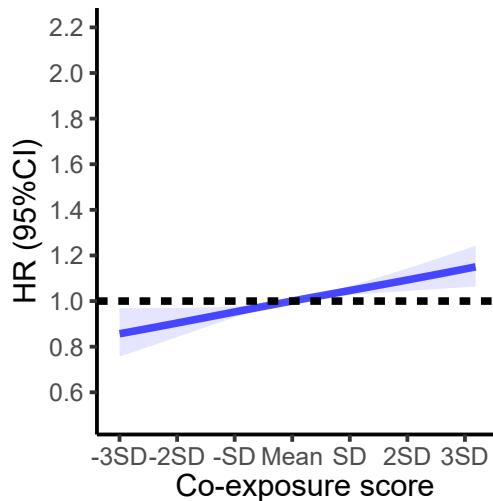

FCMD→CMM

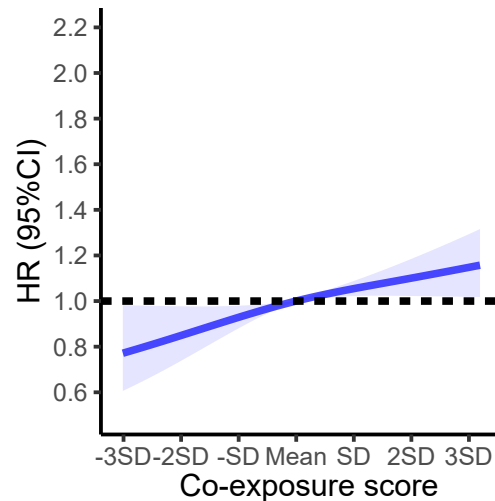

FCMD→Death

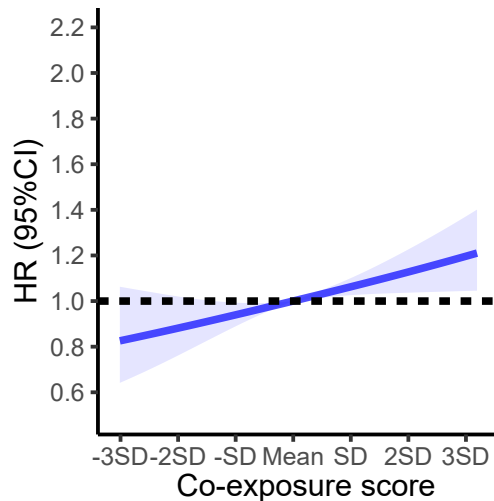

CMM→Death

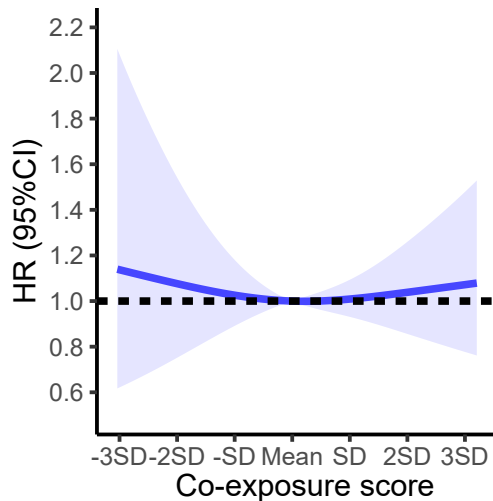

**f. Co-exposure score**
