# Supplementary material for: Long-term air pollution, cardiometabolic multimorbidity, and genetic susceptibility: a multi-state modeling study of 415,855 participants
Source: bioRxiv or medRxiv preprint supplement (doi:10.1101/2022.09.15.22280006), 2022-09-19
Supplement: Supplementary file [file media-5.pdf]

### Co-exposure score (Quintiles)

HR (95%CI)

p-values

#### Baseline→FCMD

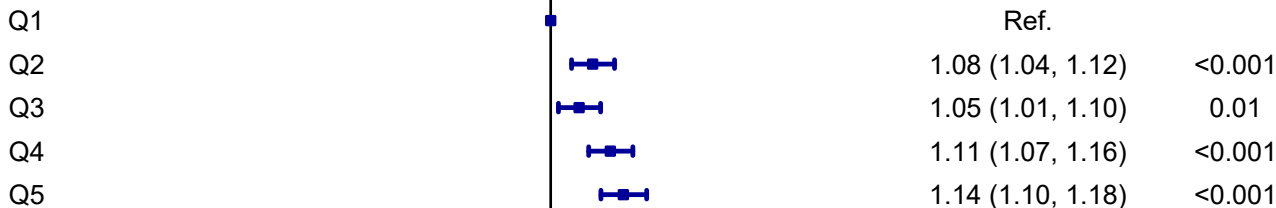

#### Baseline→Death

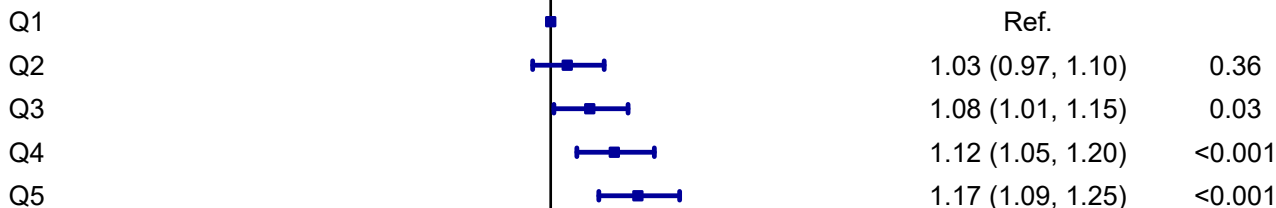

#### FCMD→CMM

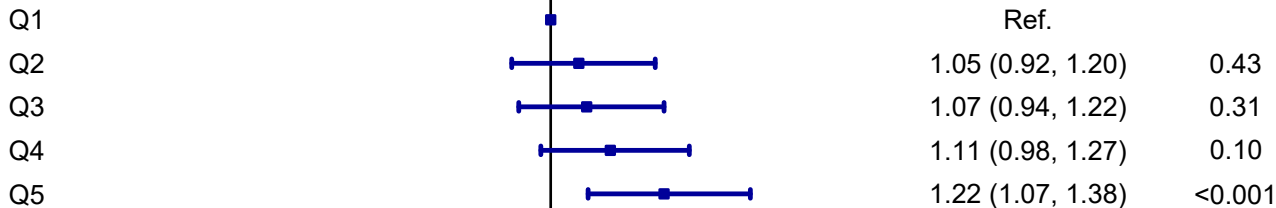

#### FCMD→Death

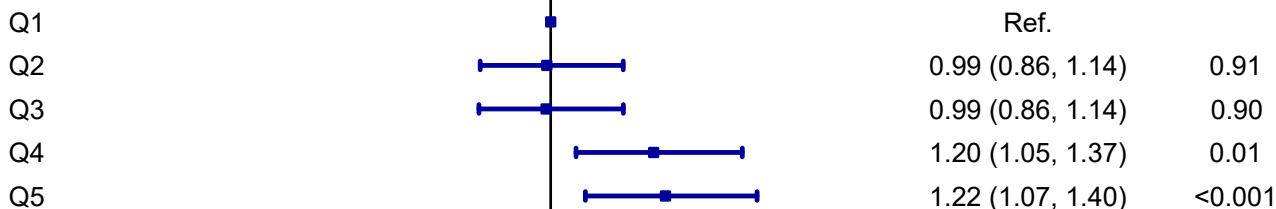

#### CMM→Death

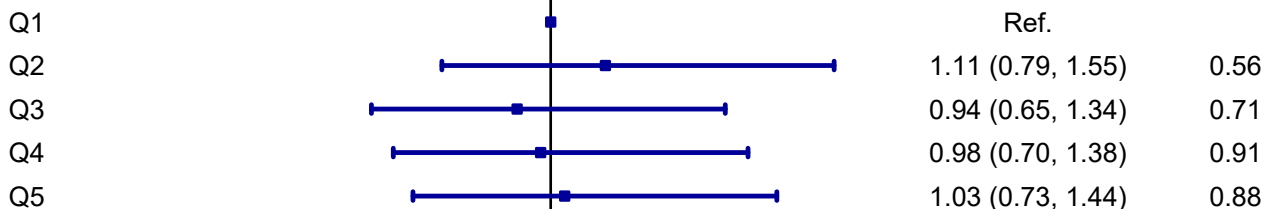

0.6 0.8 1 1.2 1.4 1.6  
Hazard Ratio(95%CI)
